# Supplementary material
Source: Springer Nature journal article supplement (https://www.springermedizin.de/resource/supplementary/12936_2012_2780_MOESM1_ESM.pdf/9544528)

$$100 * (cPred(0) - cPred(1))/cPred(0)$$

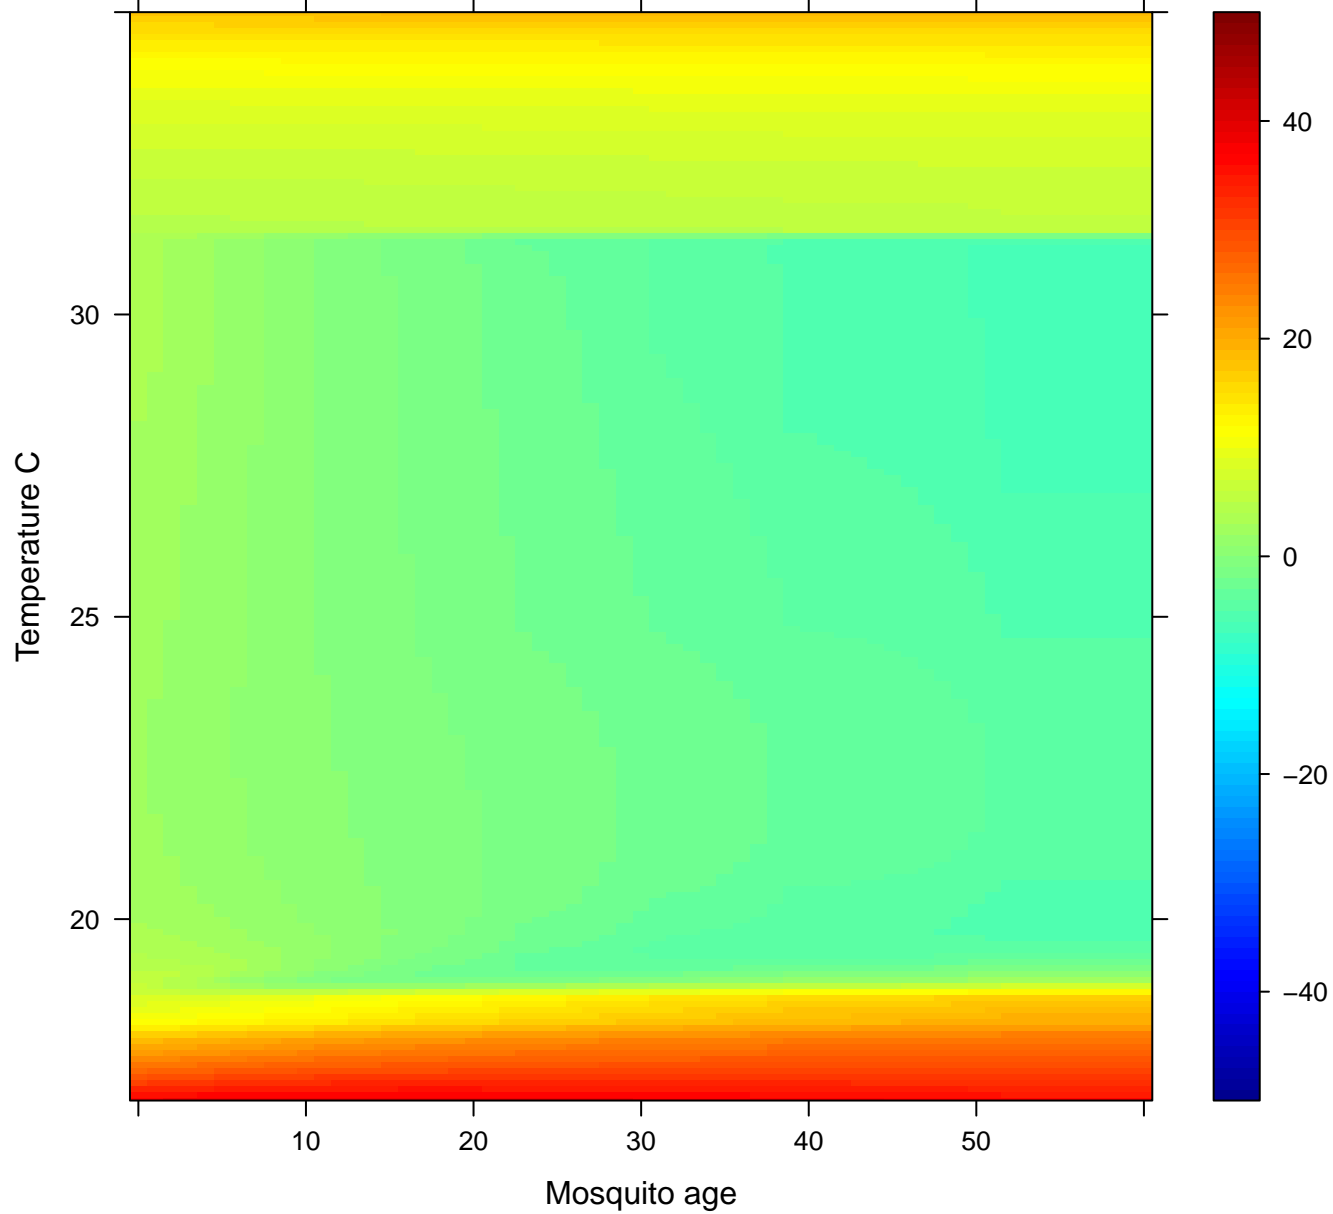

Supplement: MOESM1 [file 9544528]
